# Supplementary material for: A Common Phenotype Polymorphism in Mammalian Brains Defined by Concomitant Production of Prolactin and Growth Hormone
Source: PubMed Central journal article supplement (PMC4760942; doi:10.1371/journal.pone.0149410), 2016-02-19
Supplement: pone.0149410.s011.pdf [file pone.0149410.s011.pdf]

**Table S1: Primer sequences used in qRT-PCR**

| Name  | sense   | sequence                    |
|-------|---------|-----------------------------|
| GAPDH | Forward | 3'-TGCCCCCATGTTTGTGATG-5'   |
|       | Reverse | 3'-TGTGGTCATGAGCCCTTCC-5'   |
| PRL   | Forward | 3'-GGGTCAGCCCAGAAAGCAG-5'   |
|       | Reverse | 3'-CAGTCACCAGCGGAACAGATT-5' |
| GH    | Forward | 3'-AAGAGTTCGAGCGTGCCTAC-5'  |
|       | Reverse | 3'-GGATGGTCTCTGAGAAGCAGA-5' |
