# Supplementary material for: A Common Phenotype Polymorphism in Mammalian Brains Defined by Concomitant Production of Prolactin and Growth Hormone
Source: PubMed Central journal article supplement (PMC4760942; doi:10.1371/journal.pone.0149410), 2016-02-19
Supplement: pone.0149410.s012.pdf [file pone.0149410.s012.pdf]

**Table S2: Microarray probe set**

| Array                                                        | Platform | Species | Gh           | Pri            | RPS29          | RPL30          | Oaz1             |
|--------------------------------------------------------------|----------|---------|--------------|----------------|----------------|----------------|------------------|
| [Mouse430_2] Affymetrix Mouse Genome 430 2.0 Array           | GPL1261  | Mouse   | 1437522_x_at | 1429287_a_at   | 1415833_x_at   | 1418273_a_at   | 1436292_a_at     |
|                                                              |          |         | 1456595_x_at |                | 1437413_x_at   | 1438076_at     | 1428868_a_at     |
|                                                              |          |         | 1460310_a_at |                | 1438859_x_at   | 1456266_at     |                  |
|                                                              |          |         | 1460613_x_at |                |                |                |                  |
| [RG_U34A] Affymetrix Rat Genome U34 Array                    | GPL85    | Rat     | J00739_at    | V01250cds_s_at | rc_AA965264_at | D84480_s_at    | D10706cds#3_s_at |
|                                                              |          |         |              | V01244_at      |                | rc_AI233749_at | D10706_s_at      |
|                                                              |          |         |              | E03166cds      |                |                |                  |
| [HG-U133A] Affymetrix Human Genome U133A Array               | GPL96    | Human   | 203807_x_at  | 205445_at      | 201094_at      | 200062_s_at    | 215952_s_at      |
|                                                              |          |         | 205840_x_at  |                |                |                | 200077_s_at      |
|                                                              |          |         | 206885_x_at  |                |                |                |                  |
|                                                              |          |         | 206886_x_at  |                |                |                |                  |
|                                                              |          |         | 208341_x_at  |                |                |                |                  |
|                                                              |          |         | 208342_x_at  |                |                |                |                  |
|                                                              |          |         | 211151_x_at  |                |                |                |                  |
|                                                              | GPL201   | Human   | 203807_x_at  | 205445_at      | 201094_at      | 200062_s_at    | 200077_s_at      |
|                                                              |          |         | 205840_x_at  |                |                |                |                  |
| [HG-U133_Plus_2] Affymetrix Human Genome U133 Plus 2.0 Array | GPL570   | Human   | 203807_x_at  | 205445_at      | 201094_at      | 200062_s_at    |                  |
|                                                              |          |         | 205840_x_at  |                |                |                |                  |
|                                                              |          |         | 206885_x_at  |                |                |                |                  |
|                                                              |          |         | 206886_x_at  |                |                |                |                  |
|                                                              |          |         | 208341_x_at  |                |                |                |                  |
|                                                              |          |         | 208342_x_at  |                |                |                |                  |
|                                                              |          |         | 211151_x_at  |                |                |                |                  |
| [HG-U133A_2] Affymetrix Human Genome U133A 2.0 Array         | GPL571   | Human   | 203807_x_at  | 205445_at      | 201094_at      | 200062_s_at    | D10706cds#2_s_at |
|                                                              |          |         | 205840_x_at  |                |                |                |                  |
|                                                              |          |         | 206885_x_at  |                |                |                |                  |
|                                                              |          |         | 206886_x_at  |                |                |                |                  |
|                                                              |          |         | 208341_x_at  |                |                |                |                  |
|                                                              |          |         | 208342_x_at  |                |                |                |                  |
|                                                              |          |         | 211151_x_at  |                |                |                |                  |
