# Supplementary material for: A Common Phenotype Polymorphism in Mammalian Brains Defined by Concomitant Production of Prolactin and Growth Hormone
Source: PubMed Central journal article supplement (PMC4760942; doi:10.1371/journal.pone.0149410), 2016-02-19
Supplement: pone.0149410.s013.pdf [file pone.0149410.s013.pdf]

**Table S3: 134 genes associated to GH and PRL**

| MatlabID | ProbesetID   | Entrez gene id | Gene Symbol | Description                                                                                 |
|----------|--------------|----------------|-------------|---------------------------------------------------------------------------------------------|
| 254      | 1415923_at   | 17984          | Ndn         | necdin                                                                                      |
| 262      | 1415931_at   | 16002          | Igf2        | insulin-like growth factor 2                                                                |
| 486      | 1416155_at   | 15354          | Hmgb3       | high mobility group box 3                                                                   |
| 515      | 1416184_s_at | 15361          | Hmga1       | high mobility group AT-hook 1                                                               |
| 534      | 1416203_at   | 11826          | Aqp1        | aquaporin 1                                                                                 |
| 684      | 1416353_at   | 22260          | Nr1h2       | nuclear receptor subfamily 1, group H, member 2                                             |
| 836      | 1416505_at   | 15370          | Nr4a1       | nuclear receptor subfamily 4, group A, member 1                                             |
| 907      | 1416576_at   | 12702          | Socs3       | suppressor of cytokine signaling 3                                                          |
| 1312     | 1416981_at   | 56458          | Foxo1       | forkhead box O1                                                                             |
| 1313     | 1416982_at   | 56458          | Foxo1       | forkhead box O1                                                                             |
| 1314     | 1416983_s_at | 56458          | Foxo1       | forkhead box O1                                                                             |
| 1545     | 1417214_at   | 80718          | Rab27b      | RAB27b, member RAS oncogene family                                                          |
| 1546     | 1417215_at   | 80718          | Rab27b      | RAB27b, member RAS oncogene family                                                          |
| 1750     | 1417419_at   | 12443          | Ccnd1       | cyclin D1                                                                                   |
| 1751     | 1417420_at   | 12443          | Ccnd1       | cyclin D1                                                                                   |
| 2181     | 1417850_at   | 19645          | Rb1         | retinoblastoma 1                                                                            |
| 2209     | 1417878_at   | 13555          | E2f1        | E2F transcription factor 1                                                                  |
| 2263     | 1417932_at   | 16173          | Il18        | interleukin 18                                                                              |
| 2285     | 1417954_at   | 20604          | Sst         | somatostatin                                                                                |
| 2433     | 1418102_at   | 15205          | Hes1        | hairy and enhancer of split 1 (Drosophila)                                                  |
| 2646     | 1418315_at   | 26423          | Nr5a1       | nuclear receptor subfamily 5, group A, member 1                                             |
| 2653     | 1418322_at   | 12916          | Creml       | cAMP responsive element modulator                                                           |
| 2880     | 1418549_at   | 12640          | Cga         | glycoprotein hormones, alpha subunit                                                        |
| 2925     | 1418594_a_at | 17977          | Ncoa1       | nuclear receptor coactivator 1                                                              |
| 2934     | 1418603_at   | 54140          | Avpr1a      | arginine vasopressin receptor 1A                                                            |
| 2935     | 1418604_at   | 54140          | Avpr1a      | arginine vasopressin receptor 1A                                                            |
| 2964     | 1418633_at   | 18128          | Notch1      | Notch gene homolog 1 (Drosophila)                                                           |
| 2965     | 1418634_at   | 18128          | Notch1      | Notch gene homolog 1 (Drosophila)                                                           |
| 2971     | 1418640_at   | 93759          | Sirt1       | sirtuin 1 (silent mating type information regulation 2, homolog) 1 ( <i>S. cerevisiae</i> ) |
| 3087     | 1418756_at   | 22044          | Trh         | thyrotropin releasing hormone                                                               |
| 3141     | 1418810_at   | 12921          | Crhr1       | corticotropin releasing hormone receptor 1                                                  |
| 3281     | 1418950_at   | 13489          | Drd2        | dopamine receptor 2                                                                         |
| 3313     | 1418982_at   | 12606          | Cebpa       | CCAAT                                                                                       |
| 3578     | 1419247_at   | 19735          | Rgs2        | regulator of G-protein signaling 2                                                          |
| 3579     | 1419248_at   | 19735          | Rgs2        | regulator of G-protein signaling 2                                                          |
| 3756     | 1419425_at   | 12801          | Cnr1        | cannabinoid receptor 1 (brain)                                                              |
| 3828     | 1419497_at   | 12576          | Cdkn1b      | cyclin-dependent kinase inhibitor 1B                                                        |
| 3845     | 1419514_at   | 18740          | Pitx1       | paired-like homeodomain transcription factor 1                                              |

|       |              |       |        |                                                                            |
|-------|--------------|-------|--------|----------------------------------------------------------------------------|
| 3850  | 1419519_at   | 16000 | Igf1   | insulin-like growth factor 1                                               |
| 3899  | 1419568_at   | 26413 | Mapk1  | mitogen-activated protein kinase 1                                         |
| 3951  | 1419620_at   | 30939 | Pttg1  | pituitary tumor-transforming 1                                             |
| 3965  | 1419634_a_at | 14601 | Ghrh   | growth hormone releasing hormone                                           |
| 3993  | 1419662_at   | 18295 | Ogn    | osteoglycin                                                                |
| 3994  | 1419663_at   | 18295 | Ogn    | osteoglycin                                                                |
| 4089  | 1419758_at   | 18671 | Abcb1a | ATP-binding cassette, sub-family B (MDR                                    |
| 4090  | 1419759_at   | 18671 | Abcb1a | ATP-binding cassette, sub-family B (MDR                                    |
| 4497  | 1420178_at   | 20850 | Stat5a | Transcribed locus                                                          |
| 4716  | 1420410_at   | 26424 | Nr5a2  | nuclear receptor subfamily 5, group A, member 2                            |
| 4822  | 1420516_at   | 50518 | a      | nonagouti                                                                  |
| 4862  | 1420556_at   | 18429 | Oxt    | oxytocin                                                                   |
| 4959  | 1420653_at   | 21803 | Tgfb1  | transforming growth factor, beta 1                                         |
| 5021  | 1420715_a_at | 19016 | Pparg  | peroxisome proliferator activated receptor gamma                           |
| 5071  | 1420765_a_at | 20371 | Foxp3  | forkhead box P3                                                            |
| 5215  | 1420909_at   | 22339 | Vegfa  | vascular endothelial growth factor A                                       |
| 5501  | 1421195_at   | 12425 | Cckar  | cholecystokinin A receptor                                                 |
| 5550  | 1421244_at   | 13982 | Esr1   | estrogen receptor 1 (alpha)                                                |
| 21828 | 1437522_x_at | 14599 | Gh     | growth hormone                                                             |
| 5688  | 1421382_at   | 19116 | Prlr   | prolactin receptor                                                         |
| 5697  | 1421391_at   | 22355 | Vipr2  | vasoactive intestinal peptide receptor 2                                   |
| 5702  | 1421396_at   | 18548 | Pcsk1  | proprotein convertase subtilisin                                           |
| 5750  | 1421444_at   | 18667 | Pgr    | progesterone receptor                                                      |
| 5775  | 1421469_a_at | 20850 | Stat5a | signal transducer and activator of transcription 5A                        |
| 5821  | 1421515_at   | 14536 | Nr6a1  | nuclear receptor subfamily 6, group A, member 1                            |
| 5822  | 1421516_at   | 14536 | Nr6a1  | nuclear receptor subfamily 6, group A, member 1                            |
| 5888  | 1421582_a_at | 12912 | Creb1  | cAMP responsive element binding protein 1                                  |
| 5889  | 1421583_at   | 12912 | Creb1  | cAMP responsive element binding protein 1                                  |
| 5971  | 1421665_a_at | 14715 | Gnrhr  | gonadotropin releasing hormone receptor                                    |
| 6036  | 1421730_at   | 26423 | Nr5a1  | nuclear receptor subfamily 5, group A, member 1                            |
| 6046  | 1421740_at   | 14683 | Gnas   | GNAS (guanine nucleotide binding protein, alpha stimulating) complex locus |
| 6145  | 1421839_at   | 11303 | Abca1  | ATP-binding cassette, sub-family A (ABC1), member 1                        |
| 6146  | 1421840_at   | 11303 | Abca1  | ATP-binding cassette, sub-family A (ABC1), member 1                        |
| 6172  | 1421866_at   | 14815 | Nr3c1  | nuclear receptor subfamily 3, group C, member 1                            |
| 6173  | 1421867_at   | 14815 | Nr3c1  | nuclear receptor subfamily 3, group C, member 1                            |
| 6305  | 1421999_at   | 22095 | Tshr   | thyroid stimulating hormone receptor                                       |
| 6440  | 1422134_at   | 14282 | Fosb   | FBJ osteosarcoma oncogene B                                                |
| 6450  | 1422144_at   | 16326 | Inhbe  | inhibin beta E                                                             |
| 6508  | 1422202_at   | 21834 | Thrb   | thyroid hormone receptor beta                                              |
| 6510  | 1422204_at   | 26361 | Avpr1b | arginine vasopressin receptor 1B                                           |
| 6619  | 1422313_a_at | 16011 | Igfbp5 | insulin-like growth factor binding protein 5                               |
| 6630  | 1422324_a_at | 19227 | Pthlh  | parathyroid hormone-like peptide                                           |

|       |              |       |         |                                                                            |
|-------|--------------|-------|---------|----------------------------------------------------------------------------|
| 6843  | 1422537_a_at | 15902 | Id2     | inhibitor of DNA binding 2                                                 |
| 6888  | 1422582_at   | 16846 | Lep     | leptin                                                                     |
| 6937  | 1422631_at   | 11622 | Ahr     | aryl-hydrocarbon receptor                                                  |
| 6957  | 1422651_at   | 11450 | Adipoq  | adiponectin, C1Q and collagen domain containing                            |
| 7026  | 1422720_at   | 16392 | Isl1    | ISL1 transcription factor, LIM                                             |
| 7034  | 1422728_at   | 16322 | Inha    | inhibin alpha                                                              |
| 7085  | 1422779_at   | 58994 | Smpd3   | sphingomyelin phosphodiesterase 3, neutral                                 |
| 7140  | 1422834_at   | 16508 | Kcnd2   | potassium voltage-gated channel, Shal-related family, member 2             |
| 7141  | 1422835_at   | 16508 | Kcnd2   | potassium voltage-gated channel, Shal-related family, member 2             |
| 7157  | 1422851_at   | 15364 | Hmga2   | high mobility group AT-hook 2                                              |
| 7218  | 1422912_at   | 12159 | Bmp4    | bone morphogenetic protein 4                                               |
| 7255  | 1422949_at   | 18125 | Nos1    | nitric oxide synthase 1, neuronal                                          |
| 7288  | 1422982_at   | 11835 | Ar      | androgen receptor                                                          |
| 7310  | 1423004_at   | 22354 | Vipr1   | vasoactive intestinal peptide receptor 1                                   |
| 7392  | 1423086_at   | 18145 | Npc1    | Niemann Pick type C1                                                       |
| 7434  | 1423128_at   | 11632 | Aip     | aryl-hydrocarbon receptor-interacting protein                              |
| 7706  | 1423400_at   | 16591 | Kl      | klotho                                                                     |
| 7708  | 1423402_at   | 12912 | Creb1   | cAMP responsive element binding protein 1                                  |
| 7733  | 1423427_at   | 11516 | Adcyap1 | adenylate cyclase activating polypeptide 1                                 |
| 8411  | 1424105_a_at | 30939 | Pttg1   | pituitary tumor-transforming 1                                             |
| 9238  | 1424932_at   | 13649 | Egfr    | epidermal growth factor receptor                                           |
| 9413  | 1425107_a_at | 16880 | Lifr    | leukemia inhibitory factor receptor                                        |
| 9535  | 1425229_a_at | 21416 | Tcf7l2  | transcription factor 7-like 2, T-cell specific, HMG-box                    |
| 9797  | 1425491_at   | 12166 | Bmpr1a  | bone morphogenetic protein receptor, type 1A                               |
| 9798  | 1425492_at   | 12166 | Bmpr1a  | bone morphogenetic protein receptor, type 1A                               |
| 9799  | 1425493_at   | 12166 | Bmpr1a  | bone morphogenetic protein receptor, type 1A                               |
| 9800  | 1425494_s_at | 12166 | Bmpr1a  | bone morphogenetic protein receptor, type 1A                               |
| 9856  | 1425550_a_at | 19084 | Prkar1a | protein kinase, cAMP dependent regulatory, type I, alpha                   |
| 10159 | 1425853_s_at | 19116 | Prlr    | prolactin receptor                                                         |
| 10232 | 1425926_a_at | 18424 | Otx2    | orthodenticle homolog 2 (Drosophila)                                       |
| 10409 | 1426103_a_at | 13983 | Esr2    | estrogen receptor 2 (beta)                                                 |
| 10891 | 1426585_s_at | 26413 | Mapk1   | mitogen-activated protein kinase 1                                         |
| 10945 | 1426639_a_at | 21416 | Tcf7l2  | transcription factor 7-like 2, T-cell specific, HMG-box                    |
| 11366 | 1427060_at   | 26417 | Mapk3   | mitogen-activated protein kinase 3                                         |
| 11661 | 1427355_at   | 12310 | Calca   | calcitonin                                                                 |
| 11833 | 1427527_a_at | 19227 | Pthlh   | parathyroid hormone-like peptide                                           |
| 12000 | 1427694_at   | 14715 | Gnrhr   | gonadotropin releasing hormone receptor                                    |
| 12011 | 1427705_a_at | 18033 | Nfkb1   | nuclear factor of kappa light polypeptide gene enhancer in B-cells 1, p105 |
| 12037 | 1427731_at   | 14715 | Gnrhr   | gonadotropin releasing hormone receptor                                    |
| 12088 | 1427782_a_at | 12921 | Crhr1   | corticotropin releasing hormone receptor 1                                 |
| 12095 | 1427789_s_at | 14683 | Gnas    | GNAS (guanine nucleotide binding protein, alpha stimulating) complex locus |

|       |              |        |           |                                                                         |
|-------|--------------|--------|-----------|-------------------------------------------------------------------------|
| 12307 | 1428001_at   | 22095  | Tshr      | thyroid stimulating hormone receptor                                    |
| 12480 | 1428174_x_at | 16549  | Khsrp     | KH-type splicing regulatory protein                                     |
| 12611 | 1428305_at   | 18549  | Pcsk2     | proprotein convertase subtilisin                                        |
| 12970 | 1428664_at   | 22353  | Vip       | vasoactive intestinal polypeptide                                       |
| 13131 | 1428825_at   | 14536  | Nr6a1     | nuclear receptor subfamily 6, group A, member 1                         |
| 13132 | 1428826_at   | 14536  | Nr6a1     | nuclear receptor subfamily 6, group A, member 1                         |
| 13159 | 1428853_at   | 19206  | Ptch1     | patched homolog 1                                                       |
| 13328 | 1429022_at   | 11517  | Adcyap1r1 | adenylate cyclase activating polypeptide 1 receptor 1                   |
| 40890 | 1456595_x_at | 14599  | Gh        | growth hormone                                                          |
| 13733 | 1429427_s_at | 21416  | Tcf7l2    | transcription factor 7-like 2, T-cell specific, HMG-box                 |
| 13734 | 1429428_at   | 21416  | Tcf7l2    | transcription factor 7-like 2, T-cell specific, HMG-box                 |
| 14714 | 1430408_at   | 12286  | Cacna1a   | calcium channel, voltage-dependent, P                                   |
| 14904 | 1430598_at   | 12916  | Creml     | cAMP responsive element modulator                                       |
| 15153 | 1430847_a_at | 12916  | Creml     | cAMP responsive element modulator                                       |
| 15684 | 1431378_at   | 14815  | Nr3c1     | nuclear receptor subfamily 3, group C, member 1                         |
| 16181 | 1431875_a_at | 13555  | E2f1      | E2F transcription factor 1                                              |
| 16953 | 1432647_at   | 13649  | Egfr      | epidermal growth factor receptor                                        |
| 18351 | 1434045_at   | 12576  | Cdkn1b    | cyclin-dependent kinase inhibitor 1B                                    |
| 18478 | 1434172_at   | 12801  | Cnr1      | cannabinoid receptor 1 (brain)                                          |
| 18821 | 1434515_at   | 17977  | Ncoa1     | nuclear receptor coactivator 1                                          |
| 19482 | 1435176_a_at | 15902  | Id2       | inhibitor of DNA binding 2                                              |
| 19688 | 1435382_at   | 17984  | Ndn       | necdin                                                                  |
| 19689 | 1435383_x_at | 17984  | Ndn       | necdin                                                                  |
| 19969 | 1435663_at   | 13982  | Esr1      | estrogen receptor 1 (alpha)                                             |
| 20194 | 1435888_at   | 13649  | Egfr      | epidermal growth factor receptor                                        |
| 20297 | 1435991_at   | 110784 | Nr3c2     | nuclear receptor subfamily 3, group C, member 2                         |
| 20433 | 1436127_at   | 12919  | Crhbp     | corticotropin releasing hormone binding protein                         |
| 44602 | 1460310_a_at | 14599  | Gh        | growth hormone                                                          |
| 20803 | 1436497_at   | 16000  | Igf1      | Transcribed locus                                                       |
| 21119 | 1436813_x_at | 16549  | Khsrp     | KH-type splicing regulatory protein                                     |
| 21194 | 1436888_at   | 18072  | Nhlh2     | nescient helix loop helix 2                                             |
| 21370 | 1437064_at   | 11835  | Ar        | androgen receptor                                                       |
| 21688 | 1437382_at   | 11480  | Acvr2a    | activin receptor IIA                                                    |
| 21707 | 1437401_at   | 16000  | Igf1      | insulin-like growth factor 1                                            |
| 21785 | 1437479_x_at | 21386  | Tbx3      | T-box 3                                                                 |
| 44905 | 1460613_x_at | 14599  | Gh        | growth hormone                                                          |
| 22057 | 1437751_at   | 19017  | Ppargc1a  | peroxisome proliferative activated receptor, gamma, coactivator 1 alpha |
| 22159 | 1437853_x_at | 17984  | Ndn       | necdin                                                                  |
| 22373 | 1438067_at   | 18015  | Nf1       | neurofibromatosis 1                                                     |
| 22696 | 1438390_s_at | 30939  | Pttg1     | pituitary tumor-transforming 1                                          |
| 22789 | 1438483_at   | 18125  | Nos1      | nitric oxide synthase 1, neuronal                                       |
| 22931 | 1438625_s_at | 17984  | Ndn       | PCTAIRE-motif protein kinase 1                                          |

|       |              |        |           |                                                                            |
|-------|--------------|--------|-----------|----------------------------------------------------------------------------|
| 22971 | 1438665_at   | 58994  | Smpd3     | sphingomyelin phosphodiesterase 3, neutral                                 |
| 23245 | 1438939_x_at | 17984  | Ndn       | necdin                                                                     |
| 23284 | 1438978_x_at | 17984  | Ndn       | necdin                                                                     |
| 23348 | 1439042_at   | 11517  | Adcyap1r1 | adenylate cyclase activating polypeptide 1 receptor 1                      |
| 23873 | 1439567_at   | 21386  | Tbx3      | T-box 3                                                                    |
| 23904 | 1439598_at   | 56484  | Foxo3     | forkhead box O3a                                                           |
| 23969 | 1439663_at   | 19206  | Ptch1     | Patched homolog 1                                                          |
| 24005 | 1439699_at   | 18667  | Pgr       | Transcribed locus                                                          |
| 24253 | 1439947_at   | 13070  | Cyp11a1   | cytochrome P450, family 11, subfamily a, polypeptide 1                     |
| 24612 | 1440306_at   | 110784 | Nr3c2     | Transcribed locus                                                          |
| 5605  | 1421299_a_at | 16842  | Lef1      | lymphoid enhancer binding factor 1                                         |
| 25814 | 1441508_at   | 93759  | Sirt1     | predicted gene, ENSMUSG00000062298                                         |
| 25829 | 1441523_at   | 18015  | Nf1       | neurofibromatosis 1                                                        |
| 25941 | 1441635_at   | 14536  | Nr6a1     | nuclear receptor subfamily 6, group A, member 1                            |
| 25993 | 1441687_at   | 22417  | Wnt4      | wingless-related MMTV integration site 4                                   |
| 26062 | 1441756_at   | 21416  | Tcf7l2    | Transcribed locus                                                          |
| 26084 | 1441778_at   | 11516  | Adcyap1   | Adenylate cyclase activating polypeptide 1                                 |
| 26643 | 1442337_at   | 11517  | Adcyap1r1 | adenylate cyclase activating polypeptide 1 receptor 1                      |
| 26839 | 1442533_at   | 110784 | Nr3c2     | nuclear receptor subfamily 3, group C, member 2                            |
| 27182 | 1442876_at   | 26413  | Mapk1     | Transcribed locus                                                          |
| 27255 | 1442949_at   | 18033  | Nfkb1     | nuclear factor of kappa light chain gene enhancer in B-cells 1, p105       |
| 27313 | 1443007_at   | 14683  | Gnas      | Transcribed locus                                                          |
| 27406 | 1443100_at   | 21834  | Thrb      | Transcribed locus                                                          |
| 27556 | 1443250_at   | 19735  | Rgs2      | regulator of G-protein signaling 2                                         |
| 27681 | 1443375_at   | 14683  | Gnas      | GNAS (guanine nucleotide binding protein, alpha stimulating) complex locus |
| 27703 | 1443397_at   | 17977  | Ncoa1     | nuclear receptor coactivator 1                                             |
| 27744 | 1443438_at   | 17977  | Ncoa1     | Transcribed locus                                                          |
| 28070 | 1443764_x_at | 80718  | Rab27b    | RAB27b, member RAS oncogene family                                         |
| 28308 | 1444002_at   | 26927  | Foxl2     | forkhead box L2                                                            |
| 28435 | 1444129_at   | 16392  | Isl1      | ISL1 transcription factor, LIM                                             |
| 28453 | 1444147_at   | 18549  | Pcsk2     | proprotein convertase subtilisin                                           |
| 28706 | 1444400_at   | 19645  | Rb1       | retinoblastoma 1                                                           |
| 28761 | 1444455_at   | 12286  | Cacna1a   | calcium channel, voltage-dependent, P                                      |
| 28900 | 1444594_at   | 21386  | Tbx3      | T-box 3                                                                    |
| 28933 | 1444627_at   | 19645  | Rb1       | retinoblastoma 1                                                           |
| 29073 | 1444767_at   | 14683  | Gnas      | Transcribed locus                                                          |
| 29398 | 1445092_at   | 110784 | Nr3c2     | nuclear receptor subfamily 3, group C, member 2                            |
| 29609 | 1445303_at   | 12159  | Bmp4      | bone morphogenetic protein 4                                               |
| 29666 | 1445360_at   | 21803  | Tgfb1     | Transforming growth factor, beta 1                                         |
| 30063 | 1445757_at   | 21386  | Tbx3      | T-box 3                                                                    |
| 30065 | 1445759_at   | 58994  | Smpd3     | sphingomyelin phosphodiesterase 3, neutral                                 |
| 30178 | 1445872_at   | 14536  | Nr6a1     | nuclear receptor subfamily 6, group A, member 1                            |

|       |              |        |         |                                                                            |
|-------|--------------|--------|---------|----------------------------------------------------------------------------|
| 30371 | 1446065_at   | 16508  | Kcnd2   | potassium voltage-gated channel, Shal-related family, member 2             |
| 30502 | 1446196_at   | 15364  | Hmga2   | high mobility group AT-hook 2                                              |
| 30646 | 1446340_at   | 11835  | Ar      | androgen receptor                                                          |
| 30758 | 1446452_at   | 21416  | Tcf7l2  | transcription factor 7 like 2, T cell specific, HMG box                    |
| 30833 | 1446527_at   | 11608  | Agtr1b  | angiotensin II receptor, type 1b                                           |
| 31062 | 1446756_at   | 208188 | Ghsr    | growth hormone secretagogue receptor                                       |
| 31377 | 1447071_at   | 21416  | Tcf7l2  | transcription factor 7 like 2, T cell specific, HMG box                    |
| 31404 | 1447098_at   | 16880  | Lifr    | leukemia inhibitory factor receptor                                        |
| 31941 | 1447635_at   | 19084  | Prkar1a | protein kinase, cAMP dependent regulatory, type I, alpha                   |
| 32070 | 1447764_at   | 16508  | Kcnd2   | potassium voltage-gated channel, Shal-related family, member 2             |
| 32136 | 1447830_s_at | 19735  | Rgs2    | regulator of G-protein signaling 2                                         |
| 32146 | 1447840_x_at | 13555  | E2f1    | E2F transcription factor 1                                                 |
| 32297 | 1447991_at   | 18549  | Pcsk2   | proprotein convertase subtilisin                                           |
| 32298 | 1447992_s_at | 18549  | Pcsk2   | proprotein convertase subtilisin                                           |
| 32334 | 1448029_at   | 21386  | Tbx3    | T-box 3                                                                    |
| 32452 | 1448152_at   | 16002  | Igf2    | insulin-like growth factor 2                                               |
| 32612 | 1448312_at   | 18549  | Pcsk2   | proprotein convertase subtilisin                                           |
| 32856 | 1448556_at   | 19116  | Prlr    | prolactin receptor                                                         |
| 32998 | 1448698_at   | 12443  | Ccnd1   | cyclin D1                                                                  |
| 33104 | 1448804_at   | 13070  | Cyp11a1 | cytochrome P450, family 11, subfamily a, polypeptide 1                     |
| 33337 | 1449037_at   | 12916  | Creml   | cAMP responsive element modulator                                          |
| 33461 | 1449161_at   | 13615  | Edn2    | endothelin 2                                                               |
| 33482 | 1449182_at   | 57264  | Retn    | resistin                                                                   |
| 33554 | 1449254_at   | 20750  | Spp1    | secreted phosphoprotein 1                                                  |
| 33788 | 1449488_at   | 18740  | Pitx1   | paired-like homeodomain transcription factor 1                             |
| 34005 | 1449706_s_at | 26424  | Nr5a2   | Nuclear receptor subfamily 5, group A, member 2                            |
| 34006 | 1449707_at   | 26424  | Nr5a2   | Nuclear receptor subfamily 5, group A, member 2                            |
| 34121 | 1449826_a_at | 14173  | Fgf2    | fibroblast growth factor 2                                                 |
| 34146 | 1449851_at   | 18626  | Per1    | period homolog 1 (Drosophila)                                              |
| 34176 | 1449881_a_at | 12374  | Casr    | calcium-sensing receptor                                                   |
| 34177 | 1449882_a_at | 12374  | Casr    | calcium-sensing receptor                                                   |
| 34234 | 1449939_s_at | 13386  | Dlk1    | delta-like 1 homolog (Drosophila)                                          |
| 34481 | 1450186_s_at | 14683  | Gnas    | GNAS (guanine nucleotide binding protein, alpha stimulating) complex locus |
| 34502 | 1450207_at   | 16880  | Lifr    | leukemia inhibitory factor receptor                                        |
| 34520 | 1450225_at   | 16337  | Insr    | insulin receptor                                                           |
| 34521 | 1450226_at   | 19116  | Prlr    | prolactin receptor                                                         |
| 34554 | 1450259_a_at | 20850  | Stat5a  | signal transducer and activator of transcription 5A                        |
| 34557 | 1450262_at   | 56708  | Clcf1   | cardiotrophin-like cytokine factor 1                                       |
| 34592 | 1450297_at   | 16193  | Il6     | interleukin 6                                                              |
| 34656 | 1450361_at   | 19127  | Prop1   | paired like homeodomain factor 1                                           |
| 34687 | 1450392_at   | 11303  | Abca1   | ATP-binding cassette, sub-family A (ABC1), member 1                        |

|       |              |        |           |                                                                            |
|-------|--------------|--------|-----------|----------------------------------------------------------------------------|
| 34739 | 1450444_a_at | 22259  | Nr1h3     | nuclear receptor subfamily 1, group H, member 3                            |
| 34766 | 1450471_at   | 17127  | Smad3     | MAD homolog 3 (Drosophila)                                                 |
| 34767 | 1450472_s_at | 17127  | Smad3     | MAD homolog 3 (Drosophila)                                                 |
| 34805 | 1450510_a_at | 12286  | Cacna1a   | calcium channel, voltage-dependent, P                                      |
| 34862 | 1450567_a_at | 12824  | Col2a1    | collagen, type II, alpha 1                                                 |
| 34868 | 1450573_at   | 11705  | Amh       | anti-Mullerian hormone                                                     |
| 34902 | 1450607_s_at | 171530 | Ucn2      | urocortin 2                                                                |
| 34990 | 1450695_at   | 11622  | Ahr       | aryl-hydrocarbon receptor                                                  |
| 35018 | 1450723_at   | 16392  | Isl1      | ISL1 transcription factor, LIM                                             |
| 35043 | 1450748_at   | 58994  | Smpd3     | sphingomyelin phosphodiesterase 3, neutral                                 |
| 35068 | 1450773_at   | 16508  | Kcnd2     | potassium voltage-gated channel, Shal-related family, member 2             |
| 35075 | 1450780_s_at | 15364  | Hmga2     | high mobility group AT-hook 2                                              |
| 35076 | 1450781_at   | 15364  | Hmga2     | high mobility group AT-hook 2                                              |
| 35077 | 1450782_at   | 22417  | Wnt4      | wingless-related MMTV integration site 4                                   |
| 35090 | 1450795_at   | 16866  | Lhb       | lutening hormone beta                                                      |
| 35094 | 1450799_at   | 11517  | Adcyap1r1 | adenylate cyclase activating polypeptide 1 receptor 1                      |
| 35119 | 1450824_at   | 19206  | Ptch1     | patched homolog 1                                                          |
| 35291 | 1450996_at   | 14308  | Fshb      | follicle stimulating hormone beta                                          |
| 35299 | 1451004_at   | 11480  | Acvr2a    | activin receptor IIA                                                       |
| 35605 | 1451310_a_at | 13039  | Ctsl      | cathepsin L                                                                |
| 35825 | 1451530_at   | 13649  | Egfr      | epidermal growth factor receptor                                           |
| 36024 | 1451729_at   | 12166  | Bmpr1a    | bone morphogenetic protein receptor, type 1A                               |
| 36139 | 1451844_at   | 19116  | Prlr      | prolactin receptor                                                         |
| 36145 | 1451850_at   | 19116  | Prlr      | prolactin receptor                                                         |
| 36187 | 1451892_at   | 16591  | Kl        | klotho                                                                     |
| 36254 | 1451959_a_at | 22339  | Vegfa     | vascular endothelial growth factor A                                       |
| 36299 | 1452004_at   | 12310  | Calca     | calcitonin                                                                 |
| 36309 | 1452014_a_at | 16000  | Igf1      | insulin-like growth factor 1                                               |
| 36327 | 1452032_at   | 19084  | Prkar1a   | protein kinase, cAMP dependent regulatory, type I, alpha                   |
| 36409 | 1452114_s_at | 16011  | Igfbp5    | insulin-like growth factor binding protein 5                               |
| 36820 | 1452525_a_at | 18015  | Nf1       | neurofibromatosis 1                                                        |
| 36824 | 1452529_a_at | 12912  | Creb1     | cAMP responsive element binding protein 1                                  |
| 36895 | 1452600_at   | 225895 | Taf6l     | TAF6-like RNA polymerase II, p300                                          |
| 36985 | 1452690_at   | 16549  | Khsrp     | KH-type splicing regulatory protein                                        |
| 37399 | 1453104_at   | 26413  | Mapk1     | mitogen-activated protein kinase 1                                         |
| 37708 | 1453413_at   | 14683  | Gnas      | GNAS (guanine nucleotide binding protein, alpha stimulating) complex locus |
| 37891 | 1453596_at   | 15902  | Id2       | inhibitor of DNA binding 2                                                 |
| 38155 | 1453860_s_at | 14815  | Nr3c1     | nuclear receptor subfamily 3, group C, member 1                            |
| 38608 | 1454313_at   | 13649  | Egfr      | epidermal growth factor receptor                                           |
| 20704 | 1436398_at   | 16842  | Lef1      | Transcribed locus                                                          |
| 39255 | 1454960_at   | 17127  | Smad3     | MAD homolog 3 (Drosophila)                                                 |

|       |              |       |          |                                                                                                               |
|-------|--------------|-------|----------|---------------------------------------------------------------------------------------------------------------|
| 39569 | 1455274_at   | 50518 | a        | Transcribed locus, weakly similar to XP_001373728.1<br>PREDICTED: similar to envelope [Monodelphis domestica] |
| 39942 | 1455647_at   | 11835 | Ar       | androgen receptor                                                                                             |
| 40067 | 1455772_at   | 18667 | Pgr      | progesterone receptor                                                                                         |
| 40087 | 1455792_x_at | 17984 | Ndn      | necdin                                                                                                        |
| 40194 | 1455899_x_at | 12702 | Socs3    | suppressor of cytokine signaling 3                                                                            |
| 40507 | 1456212_x_at | 12702 | Socs3    | suppressor of cytokine signaling 3                                                                            |
| 40690 | 1456395_at   | 19017 | Ppargc1a | peroxisome proliferative activated receptor, gamma, coactivator 1 alpha                                       |
| 40816 | 1456521_at   | 26424 | Nr5a2    | Transcribed locus                                                                                             |
| 40870 | 1456575_at   | 17984 | Ndn      | Necdin                                                                                                        |
| 25066 | 1440760_at   | 16842 | Lef1     | lymphoid enhancer binding factor 1                                                                            |
| 41858 | 1457563_at   | 13649 | Egfr     | epidermal growth factor receptor                                                                              |
| 41930 | 1457635_s_at | 14815 | Nr3c1    | nuclear receptor subfamily 3, group C, member 1                                                               |
| 42019 | 1457724_at   | 13039 | Ctsl     | cathepsin L                                                                                                   |
| 42172 | 1457877_at   | 13982 | Esr1     | Transcribed locus                                                                                             |
| 42279 | 1457984_at   | 12918 | Crh      | corticotropin releasing hormone                                                                               |
| 42462 | 1458167_at   | 16508 | Kcnd2    | potassium voltage-gated channel, Shal-related family, member 2                                                |
| 42489 | 1458194_at   | 13070 | Cyp11a1  | cytochrome P450, family 11, subfamily a, polypeptide 1                                                        |
| 42574 | 1458279_at   | 56484 | Foxo3    | Transcribed locus                                                                                             |
| 42607 | 1458312_at   | 12286 | Cacna1a  | Transcribed locus                                                                                             |
| 42833 | 1458538_at   | 93759 | Sirt1    | Transcribed locus                                                                                             |
| 42921 | 1458626_at   | 18125 | Nos1     | Nitric oxide synthase 1, neuronal                                                                             |
| 43083 | 1458788_at   | 18015 | Nf1      | Transcribed locus                                                                                             |
| 43465 | 1459170_at   | 56458 | Foxo1    | forkhead box O1                                                                                               |
| 43583 | 1459288_at   | 16508 | Kcnd2    | potassium voltage-gated channel, Shal-related family, member 2                                                |
| 44289 | 1459996_at   | 12286 | Cacna1a  | Calcium channel, voltage-dependent, P                                                                         |
| 44348 | 1460055_at   | 18015 | Nf1      | Transcribed locus                                                                                             |
| 44595 | 1460303_at   | 14815 | Nr3c1    | nuclear receptor subfamily 3, group C, member 1                                                               |
| 39029 | 1454734_at   | 16842 | Lef1     | lymphoid enhancer binding factor 1                                                                            |
| 44628 | 1460336_at   | 19017 | Ppargc1a | peroxisome proliferative activated receptor, gamma, coactivator 1 alpha                                       |
| 44712 | 1460420_a_at | 13649 | Egfr     | epidermal growth factor receptor                                                                              |
| 44874 | 1460582_x_at | 50518 | a        | Transcribed locus, weakly similar to XP_001373728.1<br>PREDICTED: similar to envelope [Monodelphis domestica] |
| 44883 | 1460591_at   | 13982 | Esr1     | estrogen receptor 1 (alpha)                                                                                   |
| 13593 | 1429287_a_at | 19109 | Prl      | prolactin                                                                                                     |
