# Supplementary material for: A Common Phenotype Polymorphism in Mammalian Brains Defined by Concomitant Production of Prolactin and Growth Hormone
Source: PubMed Central journal article supplement (PMC4760942; doi:10.1371/journal.pone.0149410), 2016-02-19
Supplement: pone.0149410.s014.pdf [file pone.0149410.s014.pdf]

**Table S4 Genes location**

| MATLABID | Probe Set ID | Symbol | Gene Description                     | Gene Accession | Cytoband           | UniGene ID | Chr   | Strand | Start     | Stop      | SwissProt mRNA Access | SwissProt access |
|----------|--------------|--------|--------------------------------------|----------------|--------------------|------------|-------|--------|-----------|-----------|-----------------------|------------------|
| 4765     | 10392135     | Gh     | growth hormone                       | NM_008117      | 11 D 11 65.0 cM    | Mm.343934  | chr11 | -      | 106161582 | 106163124 | NM_008117             | P06880           |
| 6056     | 10404264     | Prl    | prolactin                            | NM_011164      | 13 A3.1 13 14.0 cM | Mm.1270    | chr13 | +      | 27149445  | 27157061  | NM_011164             | P06879           |
| 16609    | 10503947     | Cga    | glycoprotein hormones, alpha subunit | NM_009889      | 4 A5 4 10.5 cM     | Mm.1361    | chr4  | +      | 34841028  | 34854623  | BC087926              | P01216           |
| 4937     | 10394240     | Pomc   | pro-opiomelanocortin-alpha           | NM_008895      | 12 A1.1 12 4.0 cM  | Mm.277996  | chr12 | +      | 3954951   | 3960618   | NM_008895             | P01193           |
