# Supplementary material for: A Common Phenotype Polymorphism in Mammalian Brains Defined by Concomitant Production of Prolactin and Growth Hormone
Source: PubMed Central journal article supplement (PMC4760942; doi:10.1371/journal.pone.0149410), 2016-02-19
Supplement: pone.0149410.s016.pdf [file pone.0149410.s016.pdf]

**Table S6: miRNAs associated with expression of GH and PRL transcripts**

| <b>miRNA</b> | <b>gene</b> | <b>source</b>                   |
|--------------|-------------|---------------------------------|
| miR-203      | PRL         | Integrated Database             |
| miR-223      | PRL         | Integrated Database, IPA* (-3p) |
| miR-143      | PRL         | Integrated Database             |
| miR-299-3p   | PRL         | Integrated Database             |
| miR-381      | PRL         | Integrated Database             |
| miR-300      | PRL         | Integrated Database             |
| miR-4328     | PRL         | Integrated Database, IPA        |
| miR-490-5p   | PRL         | Integrated Database             |
| miR-5702     | PRL         | Integrated Database             |
| miR-590-3p   | GH          | Integrated Database             |
| miR-138      | GH          | Integrated Database             |
| miR-541-3p   | GH          | IPA                             |
| miR-3594-5p  | GH          | IPA                             |
| miR-4640-5p  | GH          | IPA                             |
| miR-891b     | GH          | IPA                             |
| miR-3918     | GH          | IPA                             |
| miR-4327     | PRL         | IPA                             |
| miR-769-5p   | PRL         | IPA                             |
| miR-3150-3p  | PRL         | IPA                             |
| miR-4521     | PRL         | IPA                             |

\*IPA: Ingenuity® pathway analysis
